# Supplementary material
Source: HighWire-hosted journal article supplement (https://www.jneurosci.org/content/suppl/2008/11/12/28.46.12107)
Supplement: Table_S2.pdf [file Table_S2.pdf]

**Supplemental Table 2**

|                                  | 70-day-old Females |              |               |
|----------------------------------|--------------------|--------------|---------------|
|                                  | <b>BD</b>          | <b>HFD</b>   | <b>HFD-BD</b> |
| Body Weight (grams)              | 265 ± 10           | 305 ± 12*    | 298 ± 14*     |
| Caloric intake (kcal)            | 94 ± 8             | 118 ± 12*    | 115 ± 8*      |
| % Fat                            | 42 ± 6             | 58 ± 7*      | 56 ± 4*       |
| % Carbohydrate                   | 37 ± 4             | 18 ± 6       | 23 ± 5        |
| Triglycerides (mg/dl)            | 113 ± 15           | 191 ± 14*    | 209 ± 17*     |
| NEFA (mEq/L)                     | 1.10 ± 0.12        | 1.78 ± 0.22* | 1.69 ± 0.21*  |
| PVN GAL mRNA (% Arbitrary Units) | 100 ± 8            | 172 ± 8*     | 148 ± 10*     |
| PVN GAL Peptide (ng/mg protein)  | 46 ± 5             | 78 ± 6*      | 72 ± 7*       |
| Body Fat (grams)                 | 14 ± 3             | 34 ± 5*      | 33 ± 4*       |
| Leptin (ng/ml)                   | 7.0 ± 0.3          | 24.3 ± 0.4*  | 23.1 ± 0.4*   |
| Insulin (ng/ml)                  | 1.13 ± 0.26        | 1.69 ± 0.16* | 1.57 ± 0.15*  |
| Glucose (mg/dl)                  | 135 ± 15           | 144 ± 11     | 138 ± 14      |
| Corticosterone (ng/ml)           | 196 ± 23           | 223 ± 45     | 236 ± 37      |
| NPY in ARC (ng/mg protein)       | 110 ± 6            | 121 ± 8      | 99 ± 11       |
